# Supplementary material
Source: ML conference proceedings conference paper supplement (https://proceedings.mlr.press/v164/makarenko22a.html)
Supplement: Supplementary file 1 [file makarenko22a-supp.zip]

Archive with 1 entries (1 files):
- Supplementary Material/Makarenko_CoRL_2021_final_with_Appendix.pdf
